# Supplementary material
Source: Springer Nature journal article supplement (https://www.springermedizin.de/resource/supplementary/12916_2007_138_MOESM1_ESM.pdf/9599248)

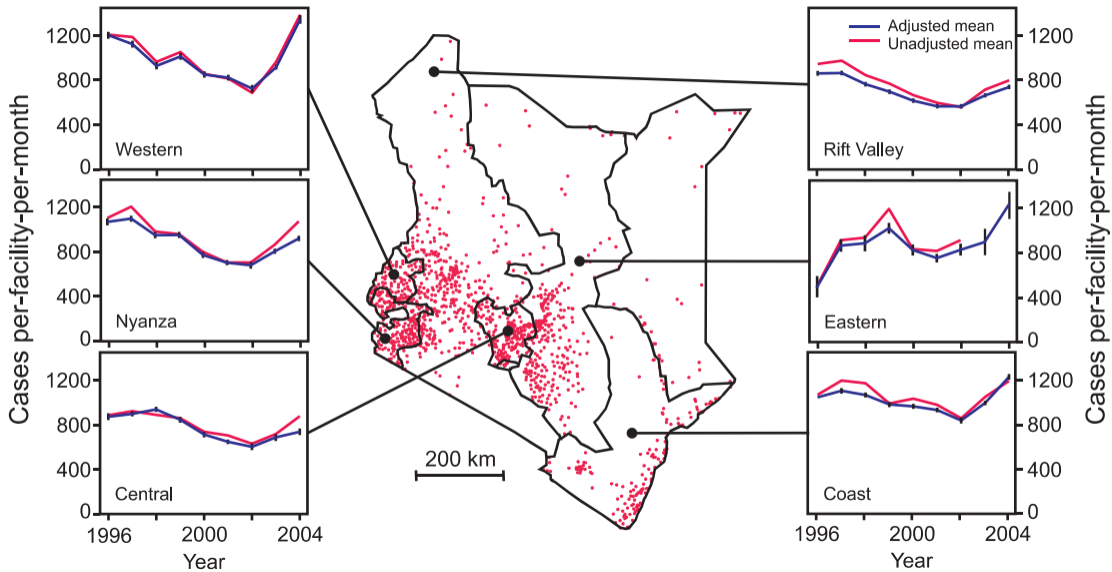

Supplement: MOESM1 [file 9599248]
